# Supplementary material for: Nesprin-3 connects plectin and vimentin to the nuclear envelope of Sertoli cells but is not required for Sertoli cell function in spermatogenesis
Source: PubMed Central journal article supplement — Mol Biol Cell. 2013 Aug 1;24(15):2454–66. doi: 10.1091/mbc.E13-02-0100 (PMC3727937; doi:10.1091/mbc.e13-02-0100), 2013-08-01
Supplement: supp_E13-02-0100v1_CombinedSupMats.pdf [file supp_E13-02-0100v1_CombinedSupMats.pdf]

# Supplemental Materials

*Molecular Biology of the Cell*

Ketema et al.

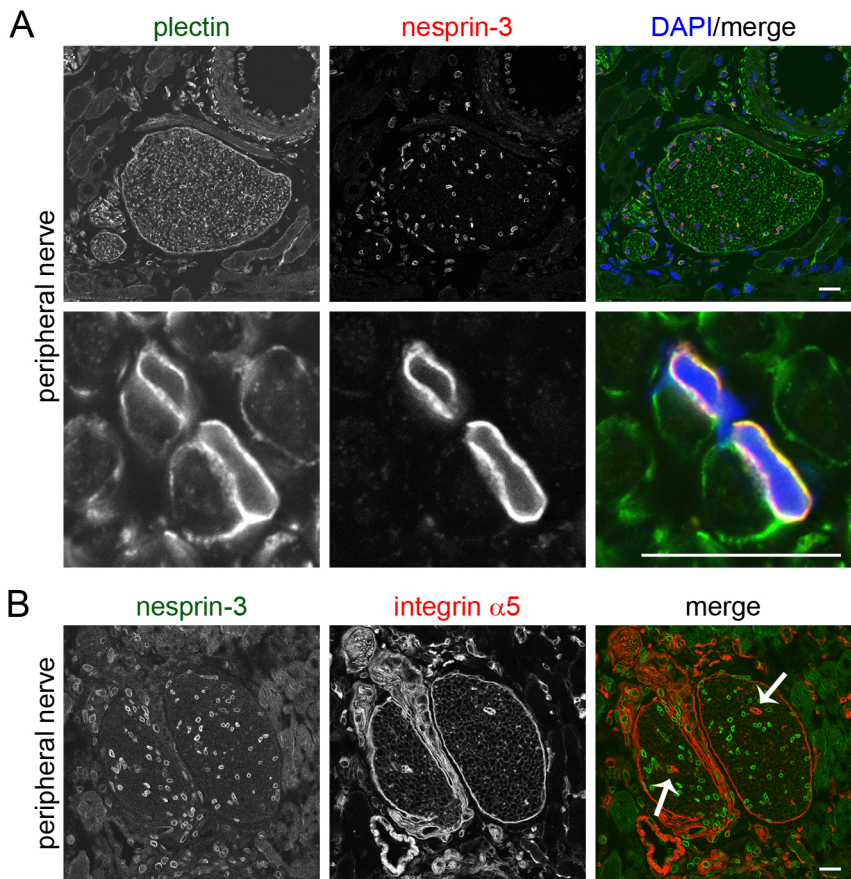

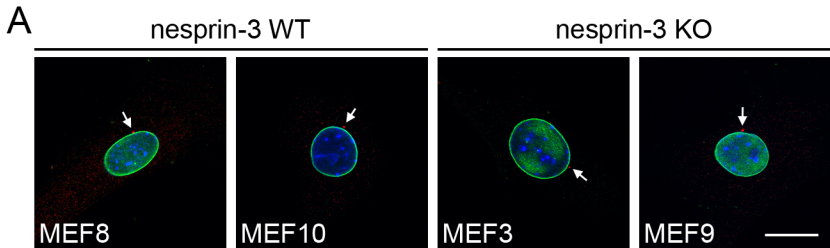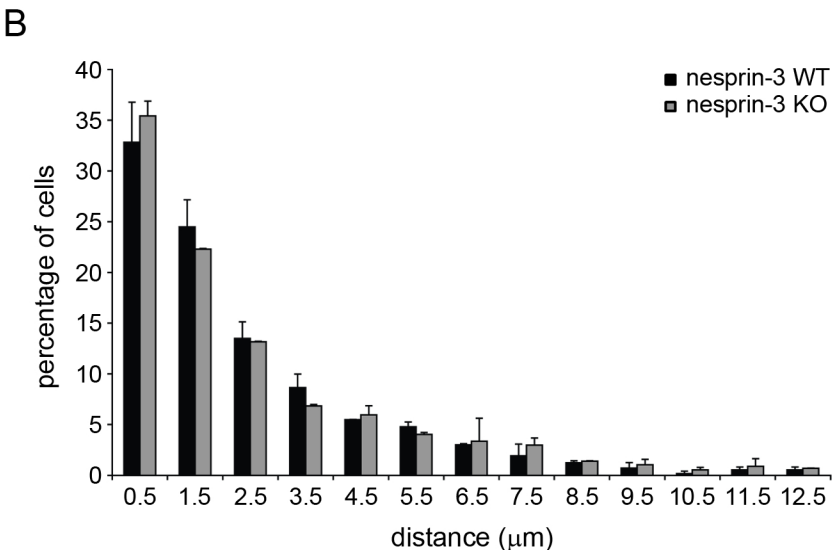

**Figure S2.** Loss of nesprin-3 does not affect the distance between the nucleus and the MTOC in MEFs.

(A) Primary MEFs were fixed in methanol and stained for lamin B (green) and  $\gamma$ -tubulin (red). Nuclei were counterstained with DAPI (blue) and cells were analyzed by confocal microscopy. Arrows indicate the position of the MTOC. Scale bar, 20  $\mu\text{m}$ . (B) Histogram displaying the distribution of the nucleus-MTOC distance. Distances were determined for 200 cells per individual MEF cell line. Error bars indicate the standard deviation over two wild-type (WT) and two knockout (KO) primary cell lines.

A

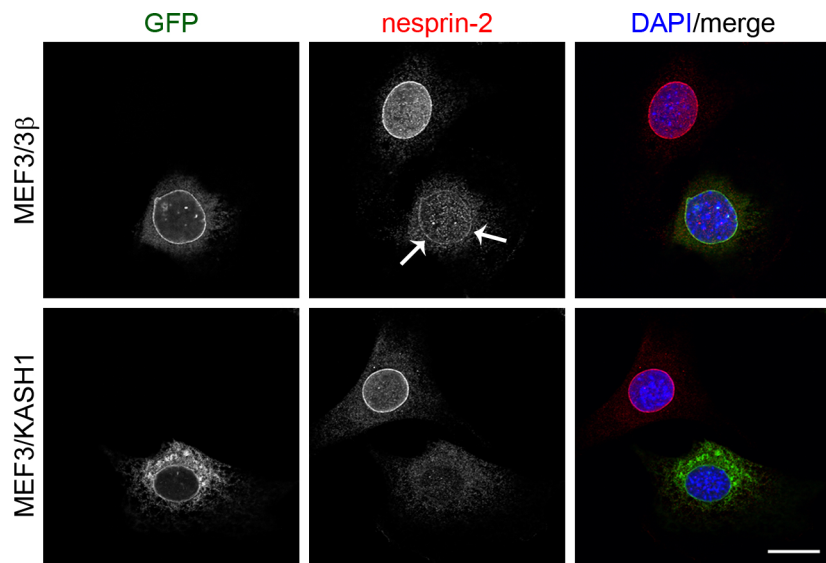

B

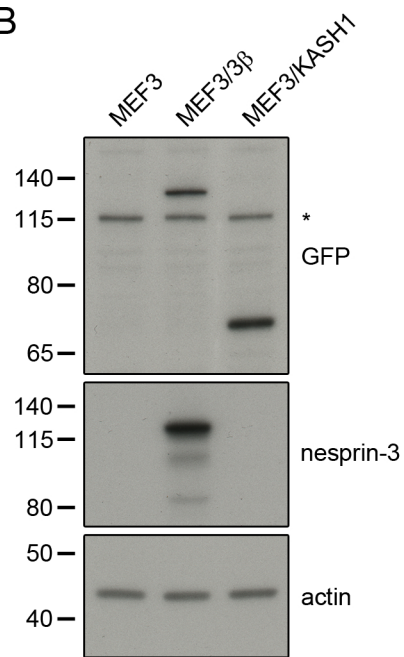

**Figure S3.** Dominant negative effect of GFP-tagged KASH proteins on endogenous nesprin-2. (A) Immortalized nesprin-3<sup>-/-</sup> cells were transfected with GFP-nesprin-3β (MEF3/3β) or GFP-dominant-negative nesprin-1 (MEF3/KASH1) and stained for endogenous nesprin-2. Nuclei were counterstained with DAPI. Arrows indicate localization of nesprin-2 at the NE. Scale bar, 20 μm. (B) Stably transfected nesprin-3<sup>-/-</sup> (MEF3) cells were lysed in RIPA lysis buffer and analyzed by Western blot for expression of the indicated proteins. Actin levels served as a loading control. The asterisk indicates a nonspecific band.
